# Supplementary material for: Digital and Data Capabilities for sexual and reproductive health: a participatory interdisciplinary approach to workforce transformation
Source: Research Square preprint supplement (doi:10.21203/rs.3.rs-7485363/v1), 2025-09-12
Supplement: Supplementary file 1 [file 719973efc796980710e8745c.docx]

**Digital and Data Capabilities for sexual and reproductive health: a participatory interdisciplinary approach to workforce transformation.**

**Semi-structured Interview Guide: Key informant interviews**

This overview is to be used as a general guide. Participants in this research will have intersecting areas of expertise and as such, each interview will be tailored to the specific experiences of the interviewee. The project will only recruit participants who are able to provide high level strategic insight and recommendations for the development of future guidelines.

| Theme | Example questions |
| --- | --- |
| Identifying best practice in digital literacy  (How is best-practice currently defined in terms of enhancing **young adult’s learning** about sexual health and mediated intimacy in digital cultures?) | Do you have a preferred working definition of digital literacy? What is it? What should a digitally literate adult know? Where & how do adults learn about digital literacy (in a theoretical or applied sense)?  How would you define best-practice in terms of digital literacy within **organisational contexts**? What would a digitally literate workplace or organisation look like? What kinds of policies would it have around digital devices and platforms?  For health researchers/practitioners:  Is digital literacy best-practice currently part of pre-service training and capacity-building **for health promotion professionals and clinicians**?   - Is digital literacy an individual or organisational attribute? - What enhances digital literacies for professionals? - Are there informal networks or communities of practice? Where are they & how do they work? - What is missing? - What is important for health professionals to know in terms of digital literacy? |
| Vernacular digital literacies (gaining a sense of what the literature says/ what practitioners observe) | What are some of the current technologies/apps young people use for seeking sexual connection and learning about sexual health?  Can you describe how they work? How young people might use them?  Whose research/practice is most useful for understanding these technologies and practices? |
| Identifying emerging technologies in sexual health and mediated intimacy | Can you give an example of any emerging technologies that may be relevant to young people’s sexual health and mediated intimacies?  How can sexual health practitioners better assess new/emerging technology as it relates to:   - their own work (e.g., chat bots for triaging) - Young people’s digital sexual cultures (the use of social platforms or dating apps)   Are there any existing research papers or reports/tools/checklists you have seen or heard of?  Are there any existing organisations or networks developing new platforms or technologies that you have seen/heard/engaged with (i.e., sextech startups)? |
| Identifying best practice in data literacy/capability | Do you have a preferred working definition of data literacy? What is it? What should a data literate adult know? Where & how do adults learn about data literacy (in a theoretical or applied sense)?  How would you define best-practice in terms of data literacy within **organisational contexts**? What would a data literate workplace or organisation look like?  Does data literacy for sexual health require high levels of expertise in data privacy and security? Does it demand an understanding of data flows in digital app and platform cultures? Or is it something else entirely?   - What is important for health promotion professionals to know in terms of data literacy? How is data used currently in the sector and what is the culture around the use of data in the sector? - What are the unique challenges / barriers to the use of data or building data capabilities in the sector? What data is available/not available and why? What skills exist in the sector, if known? What technologies are available or established?   For health researchers/practitioners:  Is data literacy best-practice currently part of pre-service training and capacity-building **for health promotion professionals and clinicians**?   - Is data literacy an individual or organisational attribute? - What enhances data literacies for professionals? - Are there informal networks or communities of practice? Where are they & how do they work? - What is missing? - What is important for health professionals to know in terms of data literacy? |
| Identifying relevant stakeholders | Is there a particular report, or body of literature, or a particular scholar that has really shaped your thinking on digital technologies and data issues? Or a particular practice space?   - Why is that person/place/resource useful to you?   Is there a person you think we should speak to in this space? Important work? Pushing boundaries? |

**Workshop Guide – Young adult sexual and reproductive health practitioners**

| **Theme** | **Activity** | **Example prompts** |
| --- | --- | --- |
| Embedding young adults' digital expertise and practices within organisational approaches and policies | Brief presentation of emerging findings from young adult workshops. | - Invite reflections from the group on findings from young adult workshops - What do leaders and policy-makers need to know about digital cultures? - Share reflections on broader sector leadership, rather than own organisations |
| Show participants the draft ‘Consumer Model’ and seek feedback. | - What are your reflections on this model? - How does this work currently happen within organisations? - What makes it difficult? Would these kinds of prompts make it easier to facilitate the work/conversations around how to do the work? - What is missing? Who is missing? - In what ways can sexual health organisations be better supported/encouraged to do this work? |
| Resources for the sexual health workforce | Share prototype and example workforce resources and organisational Checklists. | - What format would an accessible resource take? Is it a one-stop website? A toolkit? - What kind of training is required for health practitioners? |

**Workshop Guide: Construct Validation Workshops**

| **Topic** | **Activities** | **Learning outcomes** |
| --- | --- | --- |
| **Introduction** | - Welcome and acknowledgement of country - Introduction to K&S - Brief intro to project - Workshop overview - Discussion of ethics and consent for workshop |  |
| **Ice-breaker** | Participants to introduce themselves and describe their current role. |  |
| **What are digital and data capabilities for sexual health (brief introduction)** | Presentation:   - What are digital and data capabilities? How did we get here? - Why are they important for SRH in particular?   Group discussion:   - What are your reflections on the digital and data capabilities? | *Understand the nature and significance of digital and data capabilities for the SRH sector* |
| **Website walkthrough** | Presentation:   - Website walkthrough (including different highlighting the different elements and how it might be used)   Activity/discussion:   - Individual opportunity to use website - Group reflection on website |  |
| **DDCSRH in practice - Case Study activity** | Participants provided with two case studies drawn from earlier research – one related to digital capabilities, one related to data capabilities  Individual reflection:   - On Models - Find further resources on the website - Make note of some actions that can be taken (individually, organisationally, across the sector) to address the challenges posed in case studies   Group Discussion   - What capabilities are relevant to understanding the challenges presented in these case studies? - If/How can the Models help engage with the challenges presented in these scenarios? - Prompt further reflections on Models and website | *Confidently navigate the DDCSRH toolkit/website, and identify where additional training, tools or resources may be required*  *Identify the most relevant digital and data capabilities for your specific professional role and organisational context* |
| **Group Discussion** | - How might the Models support digital transformation within your organisation/role? - What are your reflections on the website? - Do you have any questions about the Models/Website? Was there anything you thought we might address today that we haven’t? - Opportunity for participants to ask questions - Post-workshop survey |  |

**Post-workshop Survey: Critical Validation Workshop**

Thank you for your participation in the Building Digital and Data Capability Workshop.

Your completion of this short survey will assist with evaluation of the resource and future development.

Please note that all survey data is anonymous.

Please contact Sam: smannix@swin.edu.au if you have any further questions.

1. One thing that I found interesting/surprising about the workshop and resources is:

[open text]

1. One thing I’m still curious about is:

[open text]

1. One thing I didn’t like about the workshop and resources is:

[open text]

1. Reflecting on your participation in the workshop, has your understanding of digital and data technologies changed?
   1. Yes, my understanding changed for the better.
   2. Yes, my understanding changed, but NOT for the better.
   3. No, I don’t think I learned anything new.
   4. I don’t know/I’m not sure.
   5. Other
2. Can you tell us more about why you answered the way that you did?

[open text]

1. On a scale of one to five (where one is not very likely and five is very likely) how likely is it that you will:
   1. Seek out further formal training focused on digital/data/AI capabilities (ie. enrol in a short course or degree)
   2. Create/join a professional community of practice focused on digital/data/AI capabilities?
   3. Share the Digital and Data Capabilities resources with your peers and colleagues?
   4. Share the Digital and Data Capabilities resources with your organisation/sector leaders and managers?
2. Can you tell us more about why you answered the way you did?

[open text]

1. Is there anything else you would like us to know?

[open text]
